# Supplementary material for: Development and evaluation of an algorithm for peripheral venous catheter placement (ALCOV): protocol for a quasi-experimental study
Source: HighWire-hosted journal article supplement (doi:10.1136/bmjopen-2023-078002), 2024-06-01
Supplement: bmjopen-2023-078002supp002_data_supplement.pdf [file bmjopen-2023-078002supp002_data_supplement.pdf]

Supplementary Table 2: End-study satisfaction questionnaire proposal (minor changes may occur depending on the early phases of the study).

| Theme                                                                                                                                                                    | Totally disagree | Disagree | Agree | Totally agree |
|--------------------------------------------------------------------------------------------------------------------------------------------------------------------------|------------------|----------|-------|---------------|
| 1. You were aware that you were participating in a study on the organization and optimization of the placement of peripheral venous lines.                               |                  |          |       |               |
| 2. Overall (throughout the process), you found this project interesting.                                                                                                 |                  |          |       |               |
| 3. In your opinion, this study has had a lasting effect on your practice of placing peripheral venous catheters.                                                         |                  |          |       |               |
| 4. In your opinion, this program allows for a real improvement in patient management in the context of peripheral venous catheter placement                              |                  |          |       |               |
| 5. The fact that the risk of vascular access difficulties is rated allows for the optimization of patient management during the placement of peripheral venous catheters |                  |          |       |               |
| 6. Using a graded management algorithm for peripheral venous catheter placement improves the quality of patient care                                                     |                  |          |       |               |
| 7. Using a graded management algorithm for peripheral venous catheter placement decreases management time                                                                |                  |          |       |               |
| 8. Using a graded management algorithm for peripheral venous catheter reduces the number of punctures required to perform the procedure                                  |                  |          |       |               |
| 9. The use of a graded management algorithm during the placement of a peripheral venous catheter reduces the discomfort and pain generated by the procedure              |                  |          |       |               |
| 10. Using a graded management algorithm during the placement of a peripheral venous catheter improves the quality of the relationship with the patient during care.      |                  |          |       |               |
| 11. The tools proposed during this study have enabled you to develop new skills                                                                                          |                  |          |       |               |
| 12. The implementation of this protocol has enabled you to anticipate difficulties during the placement of peripheral venous catheter optimally                          |                  |          |       |               |
| 13. The use of this protocol has enabled you to find the necessary resources in case of difficulty                                                                       |                  |          |       |               |
| 14. The use of this protocol for the management of peripheral venous                                                                                                     |                  |          |       |               |

|                                                                                                                          |  |  |  |  |
|--------------------------------------------------------------------------------------------------------------------------|--|--|--|--|
| catheters optimizes the resources of nursing staff                                                                       |  |  |  |  |
| 15. The implementation of this care protocol in your department has optimized collaboration between healthcare providers |  |  |  |  |
| 16. This protocol for the management of peripheral venous catheters has made you want to develop new skills              |  |  |  |  |
| 17. You think that this protocol should be applied to all departments that insert peripheral venous catheters            |  |  |  |  |
| 18. You think this protocol should be developed nationally                                                               |  |  |  |  |
| 19. You found the pain score easy to set up and use                                                                      |  |  |  |  |
| 20. You found the implementation and use of the algorithm easy                                                           |  |  |  |  |
| 21. The proposed algorithm is adapted to the functioning and possibilities of your service                               |  |  |  |  |
| 22. You will continue to use this protocol when placing peripheral venous catheters in the future                        |  |  |  |  |
| 23. You think that this protocol allows you greater autonomy in the placement of peripheral venous catheters             |  |  |  |  |
